# Supplementary material for: Medicaid Expansion and Mortality Among Persons Who Were Formerly Incarcerated
Source: PubMed Central journal article supplement (PMC11409152; doi:10.1001/jamanetworkopen.2024.29454), 2024-09-17

## Supplementary Online Content

Perera PS, Miller VE, Fitch KV, et al. Medicaid expansion and postrelease mortality among persons who were formerly incarcerated. *JAMA Netw Open*. 2024;7(9):e2429454.  
doi:10.1001/jamanetworkopen.2024.29454

### **eMethods 1.** The Statistical ARIMA Model

**eTable 1.** Causes of Death Examined in This Study Among CJ Involved Individuals From RI and NC, 2007-2019

**eTable 2.** Release-Level Demographic Distributions of Formerly Incarcerated People in Rhode Island and North Carolina by Medicaid Expansion Time Period, 2009-2018

**eTable 3.** Mortality Rates per 100,000 Person Years Among Formerly Incarcerated People by Race and Ethnicity, and Medicaid Expansion Period in Rhode Island and North Carolina, 2009-2018

**eTable 4.** Mortality Rates per 100,000 Person Years Among Formerly Incarcerated People by Race and Ethnicity, Sex, and Age and Medicaid Expansion Period in Rhode Island and North Carolina, 2009-2018

### **eMethods 2.** Sensitivity Analyses

**eTable 5:** Sensitivity Analysis Examining Potential Delayed Impact of Medicaid Expansion Implementation on Study Results

**eTable 6.** Immediate and Sustained Changes in reincarceration Rates Within One Year Post Release After Medicaid Expansion Implementation in 2014 in Rhode Island Relative to North Carolina, 2009-2018.

**eTable 7.** Immediate and Sustained Changes in one-Year All-Cause Mortality Rates Within One Year Post Release After Medicaid expansion Implementation in 2014 in Rhode Island relative to North Carolina, 2009-2018

**eFigure 1.** All-Cause Mortality ITS Graphs by Race and Ethnicity

**eFigure 2.** Unintentional Drug Overdose ITS Graphs by Race and Ethnicity

**eFigure 3.** Unintentional Opioid Overdose ITS Graphs by Race and Ethnicity

**eFigure 4.** All-Cause Mortality ITS Graphs by Age

**eFigure 5.** Unintentional Drug Overdose ITS Graphs by Age

**eFigure 6.** Unintentional Opioid Overdose ITS Graphs by Age

**eFigure 7.** All-Cause Mortality ITS Graphs by Reincarceration Status

**eFigure 8.** Reincarceration Within One Year After Release ITS Graph

This supplementary material has been provided by the authors to give readers additional information about their work.

**eMethods 1.** The statistical ARIMA model is as follows:

$$\lambda(T,X) = \beta_0 + \beta_1 T + \beta_2 I(T > T_{ME}) + \beta_3 (T - T_{ME}) * I(T > T_{ME}) + \beta_4 X + \beta_5 T * X + \beta_6 I(T > T_{ME}) * X + \beta_7 (T - T_{ME}) * I(T > T_{ME}) * X + \epsilon$$

Where,  $\lambda(T,X)$  represents the mortality rate per 100,000 person-years at time interval  $T$  (in quarters, 6-month period, or annual), for exposure group  $X$  (1=RI, 0=NC), and  $T_{ME}$  is the full time-interval after Medicaid expansion occurred,  $I$  is an indicator function that is 1 if the inside argument is true, 0 otherwise, and  $\epsilon$  is the error term. And the coefficients,

$\beta_0$  = the baseline (at time 1) mortality rate (all-cause or cause-specific) among formerly incarcerated individuals in NC

$\beta_1$  = the pre-Medicaid expansion trend (slope function) of the mortality rates for NC

$\beta_2$  = the immediate absolute change at the first post-expansion time point (also known as level change) in mortality rates in NC after the Medicaid expansion was implemented in RI (we do not expect there to be any change here, since the Medicaid expansion was not implemented in NC and no other known policy change occurred during that time that will immediately affect formerly incarcerated individuals' health in NC);

$\beta_3$  = pre- and post-expansion trend change (slope functions) of the mortality rates in NC = NC post-expansion trend minus  $\beta_1$ ;

$\beta_4$  = baseline mortality rate difference between RI and NC at time 1 = RI baseline mortality rate minus  $\beta_0$

$\beta_5$  = pre-expansion mortality rate trend difference between RI and NC = RI pre-expansion mortality rate trend minus  $\beta_1$ ;

$\beta_6$  = immediate absolute change in RI mortality rates relative to NC after the Medicaid expansion implementation = RI level change minus  $\beta_2$ ;

$\beta_7$  = pre-post expansion mortality rates trend difference in RI relative to NC after Medicaid expansion = (RI post-trend – RI pre-trend) –  $\beta_3$ .

Of main interest to us are  $\beta_6$  and  $\beta_7$  that show the immediate and sustained impact of the Medicaid expansion, respectively, in RI while controlling for NC that we assume as a counterfactual for the national mortality rate trends among formerly incarcerated people.

**eTable 1. Causes of death examined in this study among CJ involved individuals from RI and NC, 2007-2019**

| <b>Cause of Death</b>                          | <b>ICD 10 codes with subcategories</b>                                                                                                                                                                     |
|------------------------------------------------|------------------------------------------------------------------------------------------------------------------------------------------------------------------------------------------------------------|
| Unintentional drug overdose death <sup>a</sup> | X40-X44 underlying cause of deaths                                                                                                                                                                         |
| Opioid overdose death <sup>a</sup>             | X40-X44 underlying cause of death and/or T40.0 – T40.4, and T40.6 contributing cause of death                                                                                                              |
| Polydrug overdose death <sup>a</sup>           | Underlying cause of death X40-X44, including contributory codes for at least two of the following for an opioid (T40.0-T40.5, T40.6), cocaine (T40.5), methamphetamine (T43.6), and benzodiazepine (T42.4) |
| Suicide Death                                  | X60–X84, Y87.0 underlying causes of death only                                                                                                                                                             |
| Homicide Death                                 | X85–Y09, Y87.1 underlying causes of death only                                                                                                                                                             |

a – intentional and undetermined intent overdose deaths were excluded.

**eTable 2.** Release-level demographic distributions of formerly incarcerated people in Rhode Island and North Carolina by Medicaid expansion time period, 2009-2018.

| Characteristic                         | All releases              |                            | Pre-Medicaid Expansion releases |                            | Post-Medicaid Expansion releases |                            |
|----------------------------------------|---------------------------|----------------------------|---------------------------------|----------------------------|----------------------------------|----------------------------|
|                                        | RI<br>(N=35,350)<br>N (%) | NC<br>(N=238,781)<br>N (%) | RI<br>(N=18,806)<br>N (%)       | NC<br>(N=125,147)<br>N (%) | RI<br>(N=16,544)<br>N (%)        | NC<br>(N=113,634)<br>N (%) |
| Race and Ethnicity                     |                           |                            |                                 |                            |                                  |                            |
| Hispanic (any race)                    | 6,554 (18.5)              | 4,416 (1.9)                | 3,286 (17.5)                    | 2,610 (2.1)                | 3,268 (19.8)                     | 1,806 (1.6)                |
| Non-Hispanic American native           | 285 (0.8)                 | 4,750 (2.0)                | 116 (0.6)                       | 2,351 (1.9)                | 169 (1.0)                        | 2,399 (2.1)                |
| Non-Hispanic Asian or Pacific islander | 298 (0.8)                 | 535 (0.2)                  | 161 (0.9)                       | 268 (0.2)                  | 137 (0.8)                        | 267 (0.2)                  |
| Non-Hispanic black                     | 8,854 (25.1)              | 121,221 (50.8)             | 4,720 (25.1)                    | 65,902 (52.7)              | 4,314 (25.0)                     | 55,319 (48.7)              |
| Non-Hispanic white                     | 19,026 (53.8)             | 102,082 (42.8)             | 10,412 (55.4)                   | 50,793 (40.6)              | 8,614 (52.1)                     | 51,289 (45.1)              |
| Not categorized above <sup>a</sup>     | 333 (0.9)                 | 5,777 (2.4)                | 111 (0.6)                       | 3,223 (2.6)                | 222 (1.3)                        | 2,554 (2.3)                |
| Sex                                    |                           |                            |                                 |                            |                                  |                            |
| Female                                 | 3,838 (10.9)              | 29,760 (12.5)              | 2,003 (10.7)                    | 15,043 (12.0)              | 1,835 (11.1)                     | 14,717 (13.0)              |
| Male                                   | 31,512 (89.1)             | 209,021 (87.5)             | 16,803 (89.4)                   | 110,104 (88.0)             | 14,709 (88.9)                    | 98,917 (87.1)              |
| Age                                    |                           |                            |                                 |                            |                                  |                            |
| <30                                    | 14,447 (40.9)             | 97,034 (40.6)              | 7,898 (42.0)                    | 51,210 (40.9)              | 6,549 (39.6)                     | 45,824 (40.3)              |
| 30+                                    | 20,902 (59.1)             | 141,747 (59.4)             | 10,908 (58.0)                   | 73,937 (59.1)              | 9,995 (60.4)                     | 67,810 (59.7)              |

a. Not categorized above includes unknown, multiple races, or another race that was not reported.

**eTable 3.** Mortality rates per 100,000 person years among formerly incarcerated people by race and ethnicity, and Medicaid expansion period in Rhode Island and North Carolina, 2009-2018.

|                                        | Overall Rate        |                     | Pre-Medicaid Expansion |                     | Post-Medicaid Expansion |                     |
|----------------------------------------|---------------------|---------------------|------------------------|---------------------|-------------------------|---------------------|
|                                        | RI Rate<br>(95% CI) | NC Rate<br>(95% CI) | RI Rate<br>(95% CI)    | NC Rate<br>(95% CI) | RI Rate<br>(95% CI)     | NC Rate<br>(95% CI) |
| <b>All-Cause Mortality</b>             |                     |                     |                        |                     |                         |                     |
| Race and Ethnicity                     |                     |                     |                        |                     |                         |                     |
| Hispanic (any race)                    | 692 (487, 953)      | 440 (261, 695)      | 641 (373, 1,026)       | 199 (65, 465)       | 742 (453, 1,145)        | 822 (438,1,406)     |
| Non-Hispanic American native           | 1345 (277, 3932)    | 933 (663, 1275)     | 3190 (658, 9327)       | 637 (348, 1069)     | <b>0</b>                | 126 (816, 1862)     |
| Non-Hispanic Asian or Pacific islander | 401 (10, 2229)      | <b>0</b>            | 718 (18, 4,008)        | <b>0</b>            | <b>0</b>                | <b>0</b>            |
| Non-Hispanic black                     | 714 (528, 944)      | 590 (545, 637)      | 574 (355, 877)         | 473 (420, 531)      | 874 (581, 1263)         | 743 (667, 825)      |
| Non-Hispanic white                     | 1385 (1203, 1587)   | 1195 (1125, 1268)   | 1153 (933, 1409)       | 972 (885, 1064)     | 1668 (1375, 2005)       | 1534 (1419, 1655)   |
| Not categorized above <sup>a</sup>     | 369 (9, 2056)       | 197 (99, 353)       | 1029 (26, 5744)        | 31 (1, 175)         | <b>0</b>                | 418 (200, 769)      |
| <b>Unintentional Drug Overdose</b>     |                     |                     |                        |                     |                         |                     |
| Race and Ethnicity                     |                     |                     |                        |                     |                         |                     |
| Hispanic (any race)                    | 430 (273, 645)      | 195 (84, 385)       | 377 (181, 693)         | 40 (1, 222)         | 482 (257, 824)          | 443 (178, 912)      |
| Non-Hispanic American native           | <b>0</b>            | 335 (183, 562)      | <b>0</b>               | <b>0</b>            | <b>0</b>                | 706 (386, 1,185)    |
| Non-Hispanic Asian or Pacific islander | <b>0</b>            | <b>NA</b>           | <b>0</b>               | <b>0</b>            | <b>0</b>                | <b>0</b>            |
| Non-Hispanic black                     | 233 (133, 378)      | 74 (58, 92)         | 137 (44, 319)          | 24 (14, 40)         | 343 (171, 614)          | 138 (107,176)       |
| Non-Hispanic white                     | 826 (687, 985)      | 478 (434, 525)      | 607 (450, 800)         | 281 (236, 333)      | 1092 (858, 1371)        | 695 (619, 778)      |
| Not categorized above <sup>a</sup>     | <b>0</b>            | 18 (1, 100)         | <b>0</b>               | 31 (1, 175)         | <b>0</b>                | <b>0</b>            |
| <b>Opioid Overdose</b>                 |                     |                     |                        |                     |                         |                     |
| Race and Ethnicity                     |                     |                     |                        |                     |                         |                     |
| Hispanic (any race)                    | 393 (243, 600)      | 195 (84, 385)       | 339 (155, 644)         | 40 (1, 222)         | 445 (82, 777)           | 443 (178, 912)      |
| Non-Hispanic American native           | <b>0</b>            | 311 (166, 532)      | <b>0</b>               | <b>0</b>            | <b>0</b>                | 656 (349, 1,122)    |
| Non-Hispanic Asian or Pacific islander | <b>0</b>            | <b>0</b>            | <b>0</b>               | <b>0</b>            | <b>0</b>                | <b>0</b>            |

|                                           | Overall Rate        |                     | Pre-Medicaid Expansion |                     | Post-Medicaid Expansion |                     |
|-------------------------------------------|---------------------|---------------------|------------------------|---------------------|-------------------------|---------------------|
|                                           | RI Rate<br>(95% CI) | NC Rate<br>(95% CI) | RI Rate<br>(95% CI)    | NC Rate<br>(95% CI) | RI Rate<br>(95% CI)     | NC Rate<br>(95% CI) |
| Non-Hispanic black                        | 160 (80, 287)       | 56 (43, 72)         | 109 (30, 280)          | 15 (7, 28)          | 218 (88, 450)           | 111 (83, 145)       |
| Non-Hispanic white                        | 759 (626, 912)      | 421 (380, 465)      | 546 (398, 731)         | 220 (180, 267)      | 1018 (792,<br>1289)     | 642 (569, 722)      |
| Not categorized above <sup>a</sup>        | <b>0</b>            | 18 (1, 100)         | <b>0</b>               | 31 (1, 175)         | <b>0</b>                | <b>0</b>            |
| <b>Polydrug Overdose</b>                  |                     |                     |                        |                     |                         |                     |
| Race and Ethnicity                        |                     |                     |                        |                     |                         |                     |
| Hispanic (any race)                       | 187 (90, 344)       | 122 (40, 285)       | 188 (61, 440)          | 40 (1, 222)         | 185 (60, 433)           | 253 (69, 648)       |
| Non-Hispanic American<br>native           | <b>0</b>            | 311 (166, 532)      | <b>0</b>               | <b>0</b>            | <b>0</b>                | 454 (208, 862)      |
| Non-Hispanic Asian or<br>Pacific islander | <b>0</b>            | <b>0</b>            | <b>0</b>               | <b>0</b>            | <b>0</b>                | <b>0</b>            |
| Non-Hispanic black                        | 87 (32, 190)        | 33 (23, 46)         | 82 (17, 239)           | 6 (2, 17)           | 94 (19, 273)            | 68 (47, 96)         |
| Non-Hispanic white                        | 479 (375, 604)      | 199 (171, 231)      | 376 (256, 534)         | 73 (51, 102)        | 605 (434, 821)          | 338 (286, 398)      |
| Not categorized above <sup>a</sup>        | <b>0</b>            | <b>0</b>            | <b>0</b>               | <b>0</b>            | <b>0</b>                | <b>0</b>            |
| <b>Suicide</b>                            |                     |                     |                        |                     |                         |                     |
| Race and Ethnicity                        |                     |                     |                        |                     |                         |                     |
| Hispanic (any race)                       | 11 (0, 61)          | 51 (14, 132)        | 22 (1, 120)            | 41 (5, 149)         | <b>0</b>                | 68 (8, 247)         |
| Non-Hispanic American<br>native           | <b>0</b>            | <b>0</b>            | <b>0</b>               | <b>0</b>            | <b>0</b>                | <b>0</b>            |
| Non-Hispanic Asian or<br>Pacific islander | <b>0</b>            | <b>0</b>            | <b>0</b>               | <b>0</b>            | <b>0</b>                | <b>0</b>            |
| Non-Hispanic black                        | 44 (14, 102)        | 15 (10, 21)         | 64 (18, 165)           | 14 (8, 23)          | 19 (0, 106)             | 15 (8, 26)          |
| Non-Hispanic white                        | 104 (69, 152)       | 81 (66, 109)        | 90 (48, 154)           | 73 (56, 93)         | 122 (67, 205)           | 90 (70, 114)        |
| Not categorized above <sup>a</sup>        | 215 (5, 1198)       | 28 (6, 81)          | 575 (15, 3202)         | <b>0</b>            | <b>0</b>                | 65 (13, 190)        |
| <b>Homicide</b>                           |                     |                     |                        |                     |                         |                     |
| Race and Ethnicity                        |                     |                     |                        |                     |                         |                     |
| Hispanic (any race)                       | 120 (60, 214)       | 39 (8, 113)         | 151 (61, 311)          | 21 (1, 115)         | 88 (24, 225)            | 68 (8, 247)         |

|                                        | Overall Rate        |                     | Pre-Medicaid Expansion |                     | Post-Medicaid Expansion |                     |
|----------------------------------------|---------------------|---------------------|------------------------|---------------------|-------------------------|---------------------|
|                                        | RI Rate<br>(95% CI) | NC Rate<br>(95% CI) | RI Rate<br>(95% CI)    | NC Rate<br>(95% CI) | RI Rate<br>(95% CI)     | NC Rate<br>(95% CI) |
| Non-Hispanic American native           | 0                   | 212 (121, 344)      | 0                      | 197 (85, 387)       | 0                       | 230 (99, 453)       |
| Non-Hispanic Asian or Pacific islander | 0                   | 0                   | 0                      | 0                   | 0                       | 0                   |
| Non-Hispanic black                     | 131 (73, 216)       | 200 (181, 221)      | 145 (66, 275)          | 157 (135, 182)      | 114 (42, 248)           | 259 (226, 296)      |
| Non-Hispanic white                     | 35 (16, 66)         | 54 (43, 66)         | 28 (8, 71)             | 61 (46, 79)         | 44 (14, 102)            | 46 (32, 63)         |
| Not categorized above <sup>a</sup>     | 0                   | 28 (6, 80)          | 0                      | 16 (0, 89)          | 0                       | 43 (5, 157)         |

a. Not categorized above includes unknown, multiple races, or another race that was not reported.  
 American native: For RI there was a total of 3 deaths.  
 Asian: 1 death total for RI, 0 deaths for NC

**eTable 4.** Mortality rates per 100,000 person years among formerly incarcerated people by race and ethnicity, sex, and age and Medicaid expansion period in Rhode Island and North Carolina, 2009-2018.

|                                          | Overall Rate        |                     | Pre-Medicaid Expansion |                     | Post-Medicaid Expansion |                     |
|------------------------------------------|---------------------|---------------------|------------------------|---------------------|-------------------------|---------------------|
|                                          | RI Rate<br>(95% CI) | NC Rate<br>(95% CI) | RI Rate<br>(95% CI)    | NC Rate<br>(95% CI) | RI Rate<br>(95% CI)     | NC Rate<br>(95% CI) |
| <b>All-Cause Mortality</b>               |                     |                     |                        |                     |                         |                     |
| Race and Ethnicity                       |                     |                     |                        |                     |                         |                     |
| Non-Hispanic black                       | 714 (528, 944)      | 590 (545, 637)      | 574 (355, 877)         | 473 (420, 531)      | 874 (581,1263)          | 743 (667, 825)      |
| Non-Hispanic white                       | 1385 (1203, 1587)   | 1195 (1125, 1268)   | 1153 (933, 1409)       | 972 (885, 1064)     | 1,668 (1375, 2005)      | 1534 (1419, 1655)   |
| All racially minoritized people combined | 689 (497, 932)      | 474 (368, 601)      | 737 (462, 1116)        | 246 (150, 379)      | 643 (393, 993)          | 774 (571, 1,027)    |
| Sex                                      |                     |                     |                        |                     |                         |                     |
| Female                                   | 1,144 (801,1,584)   | 779 (678, 892)      | 1335 (837, 2021)       | 512 (402, 643)      | 935 (511, 1568)         | 1,082 (909,1,278)   |
| Male                                     | 1,059 (935, 1,195)  | 848 (806, 891)      | 876 (724, 1051)        | 680 (631,732)       | 1268 (1072, 1491)       | 1,054 (986, 1126)   |
| Age                                      |                     |                     |                        |                     |                         |                     |
| <30                                      | 653 (512, 821)      | 596 (545, 650)      | 603 (424, 831)         | 460 (401, 525)      | 714 (500, 989)          | 769 (683,864)       |
| 30+                                      | 1346 (1176,1533)    | 999 (945, 1055)     | 1155 (94, 1403)        | 795 (730, 864)      | 1553 (1293, 1851)       | 1241 (1152, 1334)   |
| <b>Unintentional Drug Overdose</b>       |                     |                     |                        |                     |                         |                     |
| Race and Ethnicity                       |                     |                     |                        |                     |                         |                     |
| Non-Hispanic white                       | 826 (687, 985)      | 478 (434, 525)      | 607 (450, 800)         | 281 (236, 333)      | 1092 (858, 1371)        | 695 (619, 778)      |
| All racially minoritized people combined | 301 (214, 411)      | 84 (68, 102)        | 226 (126, 372)         | 24 (14, 39)         | 380 (244, 566)          | 162 (129, 200)      |
| Sex                                      |                     |                     |                        |                     |                         |                     |
| Female                                   | 667 (413, 1020)     | 338 (273, 415)      | 728 (376, 1272)        | 132 (79, 205)       | 601 (275, 1141)         | 572 (449, 720)      |
| Male                                     | 572 (482, 674)      | 238 (217, 262)      | 400 (300, 524)         | 128 (107, 152)      | 768 (617, 945)          | 375 (334, 419)      |
| Age                                      |                     |                     |                        |                     |                         |                     |
| <30                                      | 295 (203, 415)      | 179 (152, 210)      | 212 (113, 362)         | 90 (65, 122)        | 397 (242, 613)          | 292 (240, 353)      |



|                                          | Overall Rate        |                     | Pre-Medicaid Expansion |                     | Post-Medicaid Expansion |                     |
|------------------------------------------|---------------------|---------------------|------------------------|---------------------|-------------------------|---------------------|
|                                          | RI Rate<br>(95% CI) | NC Rate<br>(95% CI) | RI Rate<br>(95% CI)    | NC Rate<br>(95% CI) | RI Rate<br>(95% CI)     | NC Rate<br>(95% CI) |
| 30+                                      | 774 (647, 919)      | 299 (270, 330)      | 594 (444, 780)         | 154 (127, 187)      | 969 (766, 1210)         | 469 (416, 528)      |
| <b>Opioid Overdose</b>                   |                     |                     |                        |                     |                         |                     |
| Race and Ethnicity                       |                     |                     |                        |                     |                         |                     |
| Non-Hispanic white                       | 759 (626, 912)      | 421 (380, 465)      | 546 (398, 731)         | 220 (180, 267)      | 1,018 (792, 1289)       | 642 (569, 722)      |
| All racially minoritized people combined | 247 (169, 349)      | 67 (54, 84)         | 196 (104, 335)         | 16 (8, 28)          | 301 (181, 470)          | 135 (106,171)       |
| Sex                                      |                     |                     |                        |                     |                         |                     |
| Female                                   | 636 (388, 982)      | 305 (243, 378)      | 728 (376, 1272)        | 104 (58, 171)       | 534 (231, 1052)         | 533 (414, 676)      |
| Male                                     | 507 (423, 604)      | 207 (185, 226)      | 347 (254, 464)         | 98 (80, 119)        | 690 (547, 859)          | 336 (298, 378)      |
| Age                                      |                     |                     |                        |                     |                         |                     |
| <30                                      | 268 (181, 383)      | 158 (132, 187)      | 179 (89, 321)          | 76 (53, 105)        | 377 (227, 589)          | 263 (213, 320)      |
| 30+                                      | 691 (571, 828)      | 257 (230, 286)      | 537 (395, 715)         | 114 (91, 142)       | 857 (667, 1085)         | 425 (374, 481)      |
| <b>Polydrug Overdose</b>                 |                     |                     |                        |                     |                         |                     |
| Race and Ethnicity                       |                     |                     |                        |                     |                         |                     |
| All racially minoritized people combined | 123 (71, 201)       | 41 (30, 54)         | 120 (52, 237)          | 7 (2,17)            | 127 (55, 250)           | 85 (62, 113)        |
| Non-Hispanic white                       | 479 (375, 604)      | 199 (171, 231)      | 376 (256, 534)         | 73 (51, 102)        | 605 (434, 821)          | 338. (286, 398)     |
| Sex                                      |                     |                     |                        |                     |                         |                     |
| Female                                   | 540 (315, 865)      | 199 (149, 259)      | 607 (291, 1116)        | 42 (15, 90)         | 467 (188, 963)          | 376 (277, 499)      |
| Male                                     | 286 (223, 361)      | 95 (81, 110)        | 219 (147, 315)         | 33 (23, 46)         | 362 (261, 490)          | 171 (144, 202)      |
| Age                                      |                     |                     |                        |                     |                         |                     |
| <30                                      | 134 (75, 221)       | 87 (68, 109)        | 98 (36, 213)           | 29 (16, 49)         | 179 (82, 339)           | 161 (123, 207)      |
| 30+                                      | 435 (341, 547)      | 122 (104, 142)      | 377 (260, 530)         | 37 (24, 54)         | 497 (355, 677)          | 222 (186, 263)      |
| <b>Suicide</b>                           |                     |                     |                        |                     |                         |                     |
| Race and Ethnicity                       |                     |                     |                        |                     |                         |                     |
| Non-Hispanic white                       | 104 (69, 152)       | 81 (16, 66)         | 90 (48, 154)           | 73 (57, 93)         | 122 (69, 205)           | 90 (70, 114)        |

|                                             | Overall Rate        |                     | Pre-Medicaid Expansion |                     | Post-Medicaid Expansion |                     |
|---------------------------------------------|---------------------|---------------------|------------------------|---------------------|-------------------------|---------------------|
|                                             | RI Rate<br>(95% CI) | NC Rate<br>(95% CI) | RI Rate<br>(95% CI)    | NC Rate<br>(95% CI) | RI Rate<br>(95% CI)     | NC Rate<br>(95% CI) |
| All racially minoritized<br>people combined | 54 (22, 111)        | 29 (21, 41)         | 53 (19, 114)           | 14 (8, 22)          | 10 (0, 53)              | 19 (11, 30)         |
| Sex                                         |                     |                     |                        |                     |                         |                     |
| Female                                      | 72 (20, 185)        | 28 (15, 46)         | 67 (8, 242)            | 18 (6, 43)          | 78 (9, 282)             | 39 (18,74)          |
| Male                                        | 71 (48, 101)        | 46 (39, 54)         | 74 (43, 119)           | 41 (32 ,51)         | 67 (36, 115)            | 52 (41, 65)         |
| Age                                         |                     |                     |                        |                     |                         |                     |
| <30                                         | 74 (41, 125)        | 46 (36, 58)         | 86 (39, 162)           | 39 (27, 54)         | 60 (20, 141)            | 56 (39, 77)         |
| 30+                                         | 69 (42, 106)        | 42 (34, 51)         | 65 (31, 120)           | 37 (28, 49)         | 73 (35, 135)            | 47 (35, 62)         |
| <b>Homicide</b>                             |                     |                     |                        |                     |                         |                     |
| Race and Ethnicity                          |                     |                     |                        |                     |                         |                     |
| Non-Hispanic white                          | 35 (16, 66)         | 54 (43, 66)         | 28 (8, 71)             | 61 (46, 79)         | 44 (14, 102)            | 46 (32, 63)         |
| All racially minoritized<br>people combined | 201 (131, 294)      | 341 (310, 376)      | 140 (80, 227)          | 146 (126,<br>168)   | 95 (46, 175)            | 241 (211, 274)      |
| Sex                                         |                     |                     |                        |                     |                         |                     |
| Female                                      | 54 (11,158)         | 29 (17, 49)         | 67 (8, 242)            | 25 (10, 52)         | 39 (1, 217)             | 34 (15, 68)         |
| Male                                        | 76 (52, 107)        | 145 (133, 158)      | 79 (47, 124)           | 124 (109,<br>141)   | 72 (39, 121)            | 172 (152, 195)      |
| Age                                         |                     |                     |                        |                     |                         |                     |
| <30                                         | 96 (57, 151)        | 194 (173, 218)      | 95 (46, 175)           | 170 (144,<br>200)   | 96 (42, 190)            | 227 (192, 267)      |
| 30+                                         | 59 (34, 94)         | 89 (34, 102)        | 65 (31, 120)           | 72 (58, 88)         | 51 (21, 106)            | 110 (91, 131)       |

**eMethods 2. Sensitivity analyses:**

We conducted sensitivity analyses by moving the effective policy implementation date from January 2014 to later dates to reflect delayed effects of policy implementation (additional details in supplemental materials). For all-cause mortality, we calculated 1-year post-release mortality rates for each quarter of a calendar year, then CITS analysis was conducted by simulating the delay of Medicaid expansion effect by three months, six months, and one year. For all unintentional overdose mortality, we calculated 1-year post-release mortality rates for each six-month interval of a calendar year, sensitivity analysis was then conducted by delaying the Medicaid expansion effect by six months and one year. And for homicide and suicide mortality, we calculated 2-year post-release mortality rates for each calendar year, sensitivity analysis was then conducted by delaying the Medicaid expansion effect by one year.

**eTable 5:** Sensitivity analysis examining potential delayed impact of Medicaid Expansion implementation on study results

| Dates representing actual and delayed implementation of Medicaid Expansion | Immediate absolute change in mortality rate after Medicaid expansion<br>$\beta_6$ (95% CI) | Sustained trend change in mortality rate per quarter after Medicaid expansion<br>$\beta_7$ (95% CI) |
|----------------------------------------------------------------------------|--------------------------------------------------------------------------------------------|-----------------------------------------------------------------------------------------------------|
| All-Cause Mortality <sup>a,c</sup>                                         |                                                                                            |                                                                                                     |
| January 1 <sup>st</sup> , 2014                                             | 280 (-135, 695)                                                                            | -72 (-108, -36)                                                                                     |
| April 1 <sup>st</sup> , 2014 (3 months delay)                              | 60 (-363, 483)                                                                             | -75 (-112, -38)                                                                                     |
| July 1 <sup>st</sup> , 2014 (6 months delay)                               | 219 (-198, 636)                                                                            | -80 (-118, -43)                                                                                     |
| January 1 <sup>st</sup> , 2015 (1 year delay)                              | 223 (-190, 635)                                                                            | -93 (-133, -53)                                                                                     |
| Unintentional Drug Overdose <sup>a,d</sup>                                 |                                                                                            |                                                                                                     |
| January 1 <sup>st</sup> , 2014                                             | 74 (-240, 388)                                                                             | -172 (-226, -118)                                                                                   |
| July 1 <sup>st</sup> , 2014 (6 months delay)                               | -7 (-313, 299)                                                                             | -180 (-235, -125)                                                                                   |
| January 1 <sup>st</sup> , 2015 (1 year delay)                              | -282 (-583, 19)                                                                            | -172 (-231, -112)                                                                                   |
| Unintentional Opioid Overdose <sup>a,d</sup>                               |                                                                                            |                                                                                                     |
| January 1 <sup>st</sup> , 2014                                             | 45.37 (-226, 317)                                                                          | -157 (-204, -110)                                                                                   |
| July 1 <sup>st</sup> , 2014 (6 months delay)                               | 25 (-233, 284)                                                                             | -167 (-213, -120)                                                                                   |
| January 1 <sup>st</sup> , 2015 (1 year delay)                              | -226 (-483, 30)                                                                            | -161 (-212, -111)                                                                                   |
| Unintentional Polydrug Overdose <sup>a,d</sup>                             |                                                                                            |                                                                                                     |
| January 1 <sup>st</sup> , 2014                                             | -155 (-350, 40)                                                                            | -62 (-96, -28)                                                                                      |
| July 1 <sup>st</sup> , 2014 (6 months delay)                               | -167 (-366, 31)                                                                            | -55(-90, -19)                                                                                       |
| January 1 <sup>st</sup> , 2015 (1 year delay)                              | -184 (-387, -19)                                                                           | -47 (-87, -7)                                                                                       |
| Suicide <sup>b,e</sup>                                                     |                                                                                            |                                                                                                     |
| July 1 <sup>st</sup> , 2014 (6 months delay)                               | 1 (-61, 64)                                                                                | 5 (-17, 26)                                                                                         |
| January 1 <sup>st</sup> , 2015 (1 year delay)                              | -17 (-75, 41)                                                                              | 9 (-14, 33)                                                                                         |
| Homicide <sup>b,e</sup>                                                    |                                                                                            |                                                                                                     |
| January 1 <sup>st</sup> , 2014                                             | -9 (-88, 70)                                                                               | -23 (-50, 4)                                                                                        |
| January 1 <sup>st</sup> , 2015 (1 year delay)                              | 5 (-66, 75)                                                                                | -29 (-57, 0)                                                                                        |

a. One-year death rate per 100,000 person-years.

b. Two-year death rate per 100,000 person-years.

c. Trends calculated per quarter.

d. Trends calculated per 6-month intervals.

e. Trends calculated per year.

**eTable 6.** Immediate and sustained changes in reincarceration rates within one year post release after Medicaid expansion implementation in 2014 in Rhode Island relative to North Carolina, 2009-2018.

| <b>Outcome</b>                               | <b>Immediate absolute change in mortality rate after Medicaid expansion<br/><math>\beta_6</math> (95% CI)</b> | <b>Sustained trend change in mortality rate after Medicaid expansion<br/><math>\beta_7</math> (95% CI)</b> |
|----------------------------------------------|---------------------------------------------------------------------------------------------------------------|------------------------------------------------------------------------------------------------------------|
| Reincarceration within one year post release | -109 (-149, -68)                                                                                              | -2 (-4, -1)                                                                                                |

**eTable 7.** Immediate and sustained changes in one-year all-cause mortality rates within one year post release after Medicaid expansion implementation in 2014 in Rhode Island relative to North Carolina, 2009-2018.

| <b>Outcome</b>                                  | <b>Immediate absolute change<br/>in mortality rate after<br/>Medicaid expansion<br/><math>\beta_6</math> (95% CI)</b> | <b>Sustained trend change in<br/>mortality rate after Medicaid<br/>expansion<br/><math>\beta_7</math> (95% CI)</b> |
|-------------------------------------------------|-----------------------------------------------------------------------------------------------------------------------|--------------------------------------------------------------------------------------------------------------------|
| No reincarceration within one year post release | 372 (-226, 970)                                                                                                       | -26 (-232, 179)                                                                                                    |
| Reincarceration within one year post release    | -117 (-611, 376)                                                                                                      | -442 (-612, -273)                                                                                                  |

**eFigure 1.** All-cause mortality ITS graphs by race and ethnicity (not non-Hispanic white includes all racially minoritized people combined).

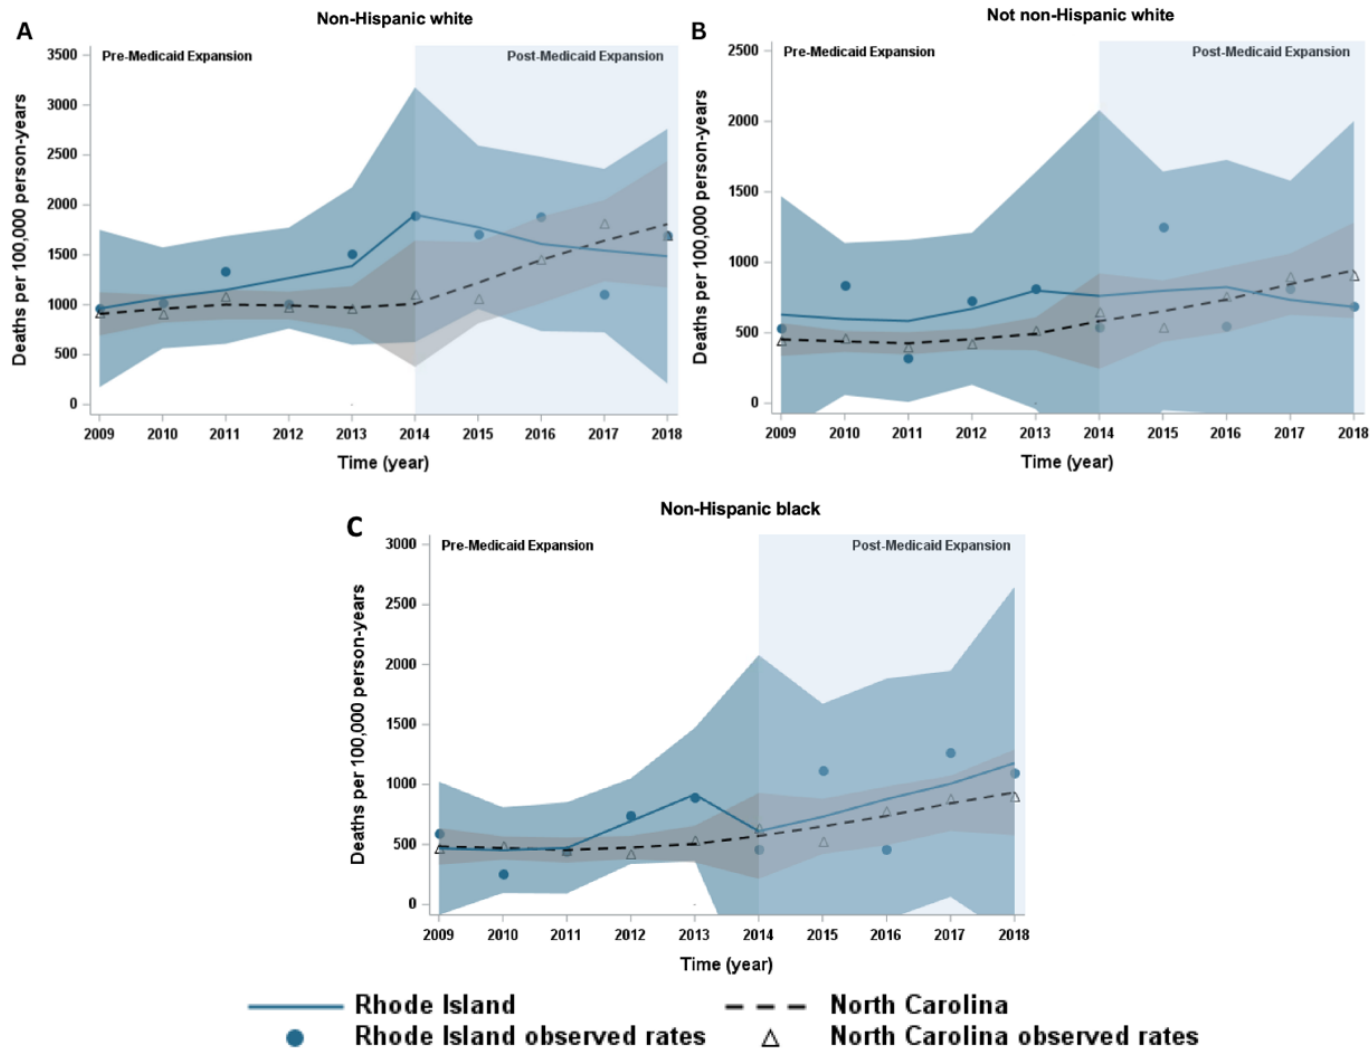

**eFigure 2.** Unintentional drug overdose ITS graphs by race and ethnicity (not non-Hispanic white includes all racially minoritized people combined).

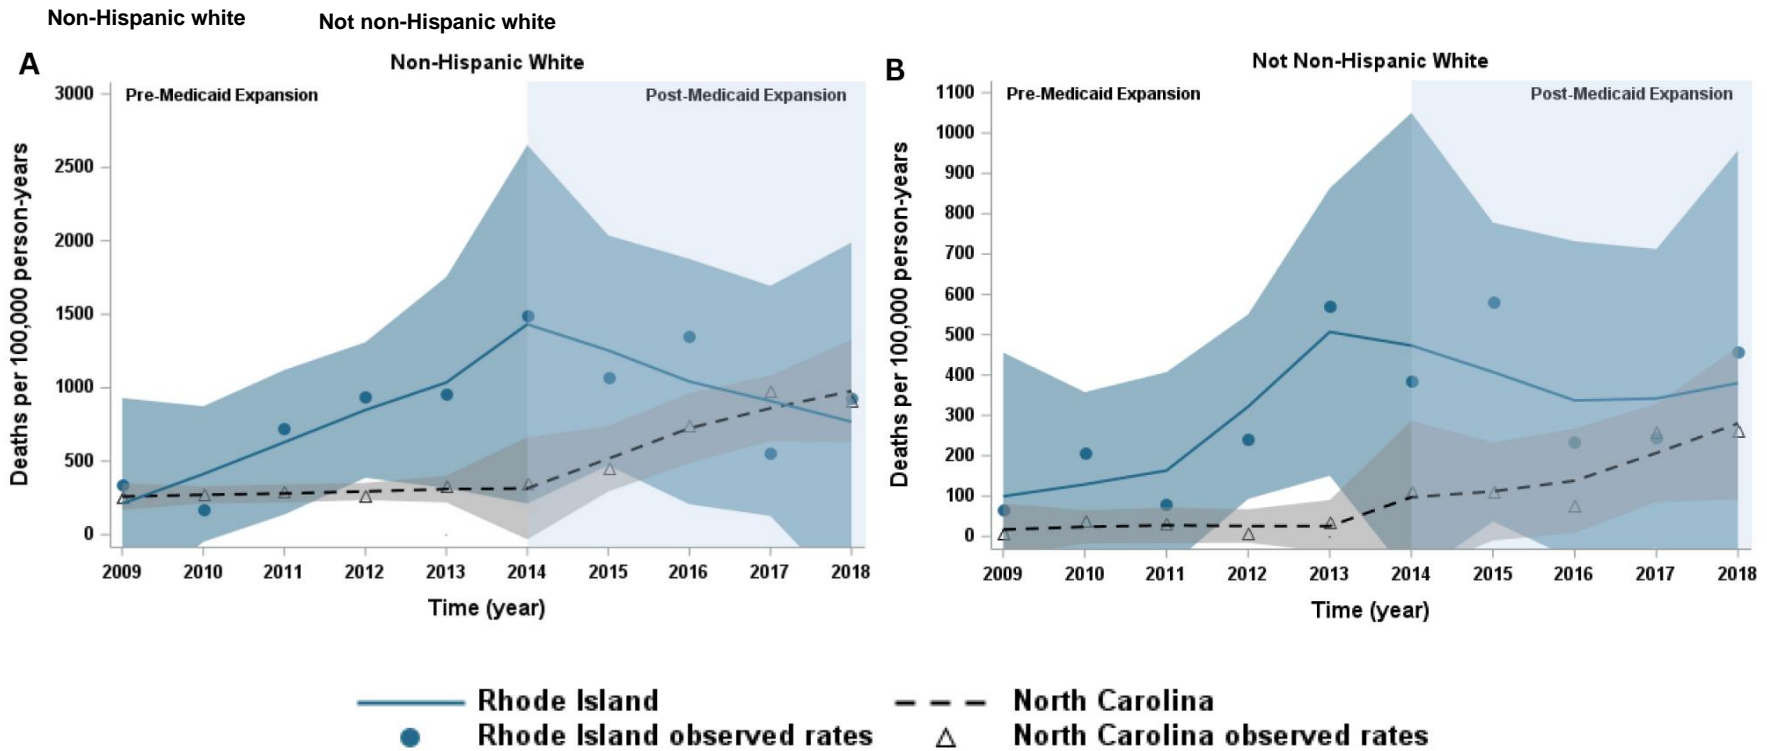



**eFigure 3.** Unintentional opioid overdose ITS graphs by race and ethnicity (not non-Hispanic white includes all racially minoritized people combined).

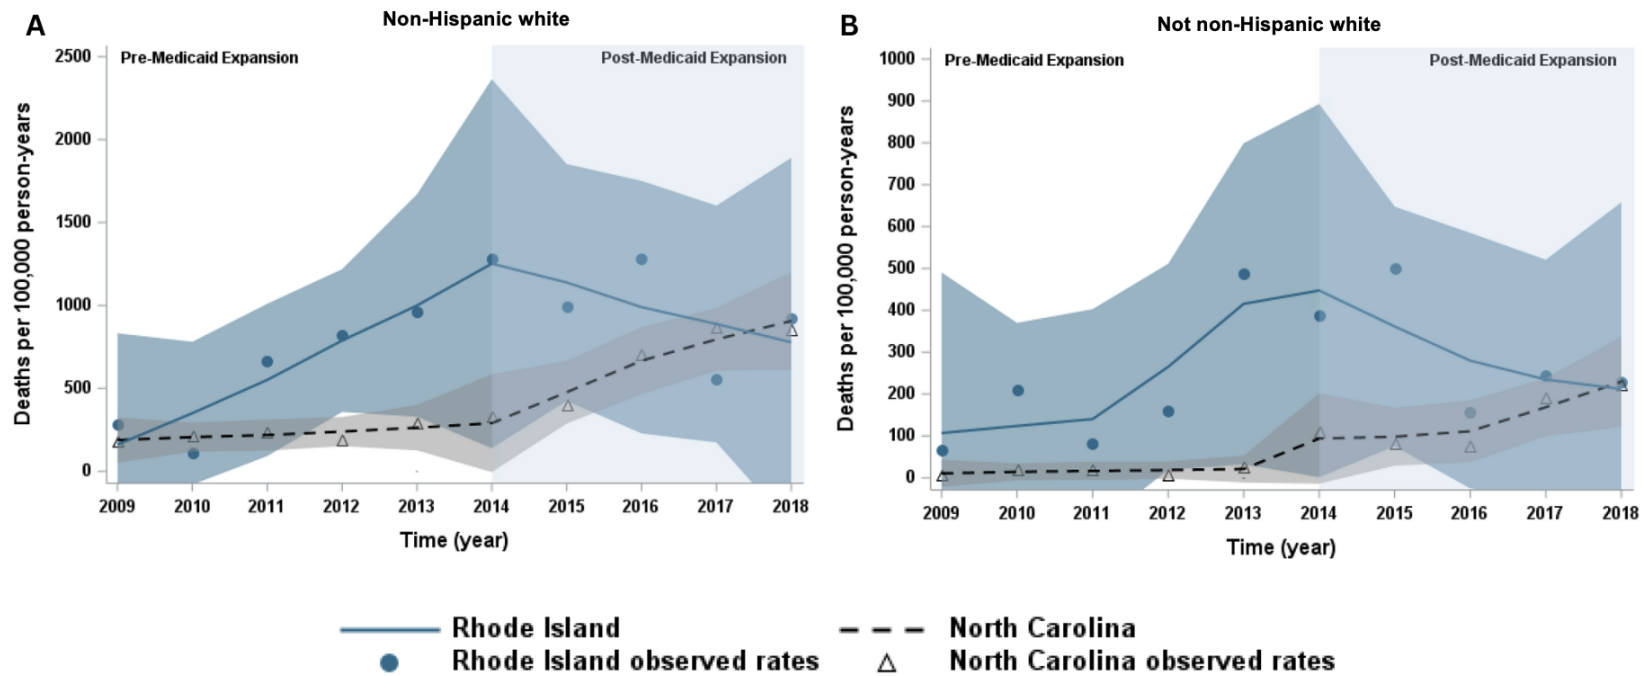

**eFigure 4.** All-cause mortality ITS graphs by age.

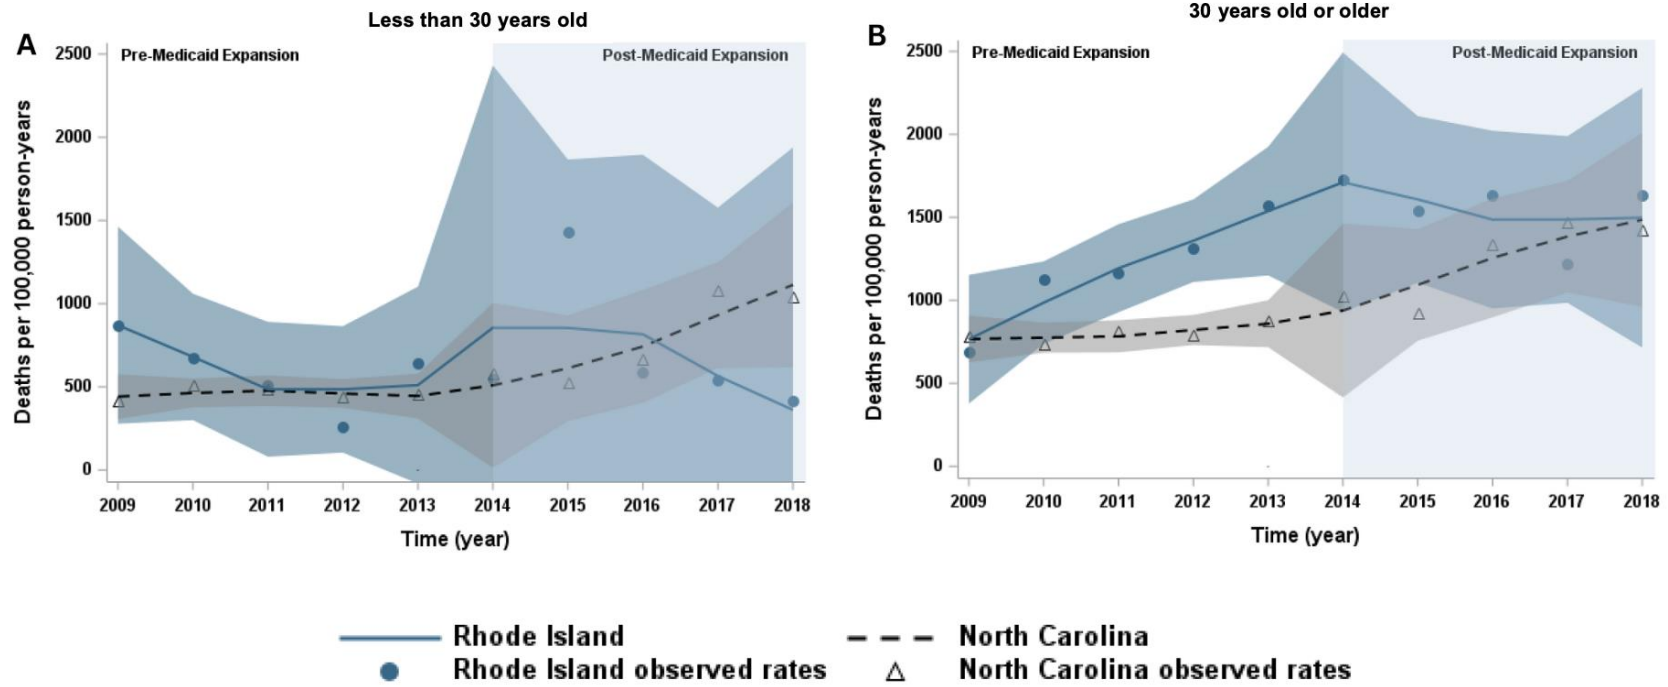

**eFigure 5.** Unintentional drug overdose ITS graphs by age.

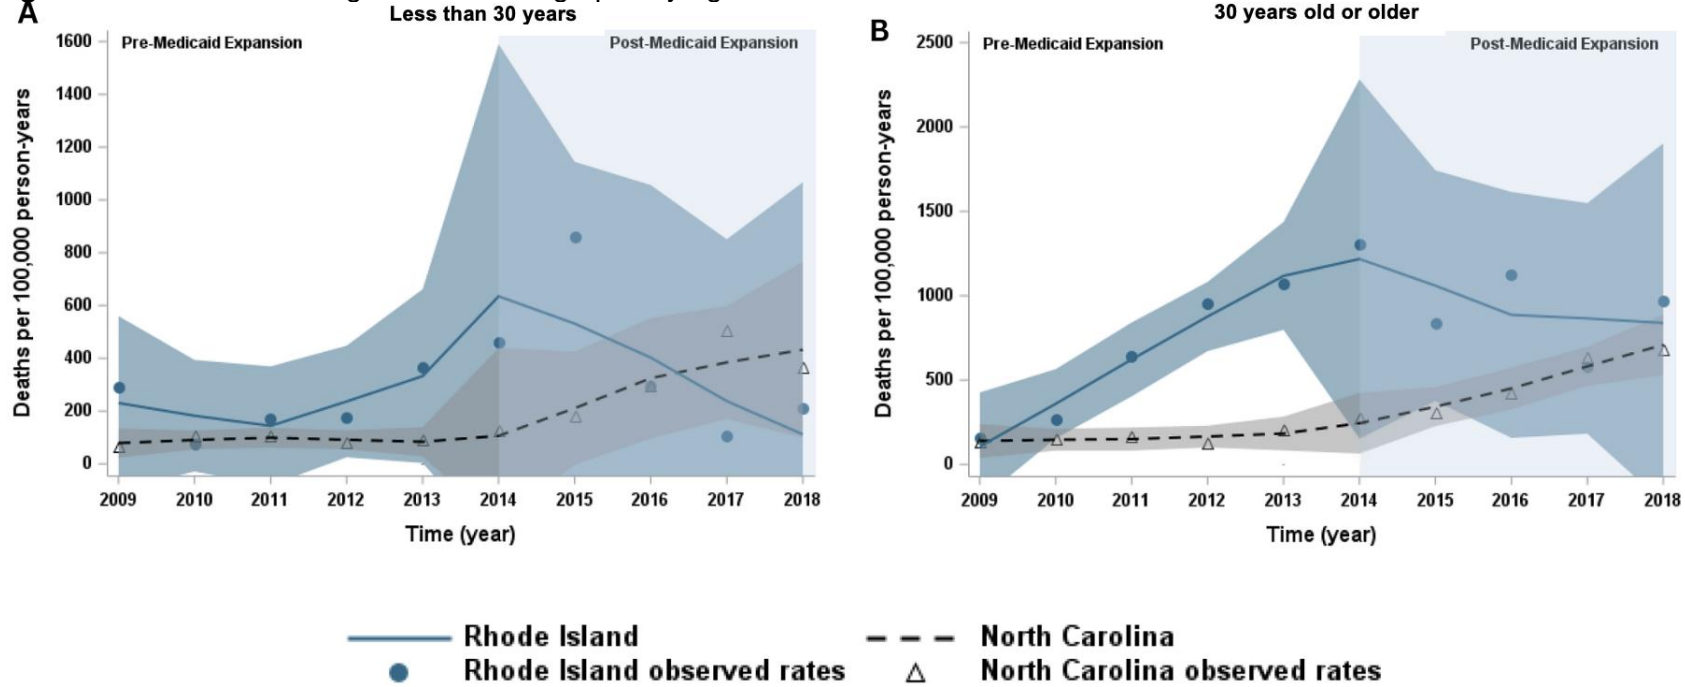

**eFigure 6.** Unintentional opioid overdose ITS graphs by age.

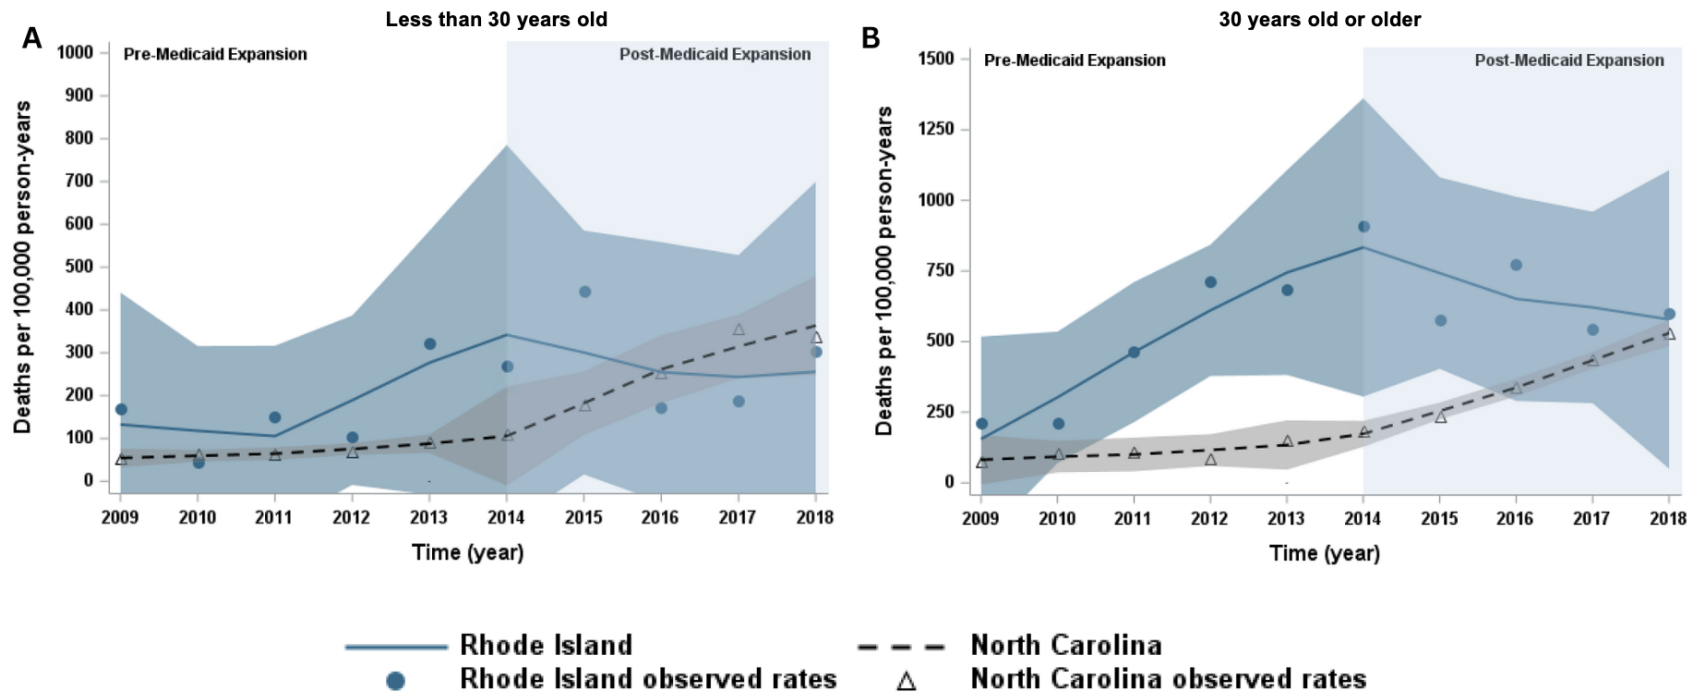

**eFigure 7.** All-cause mortality ITS graphs by reincarceration status

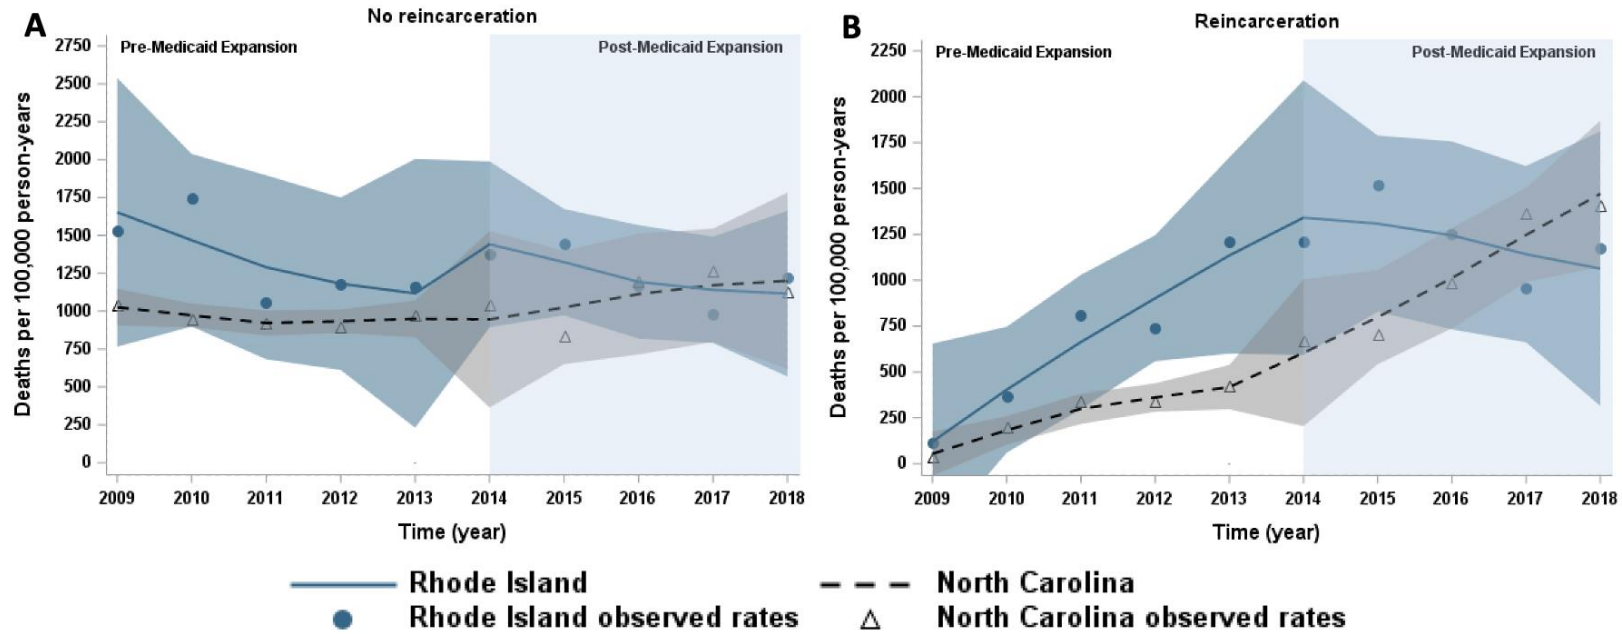

eFigure 8. Reincarceration within one year after release ITS graph.

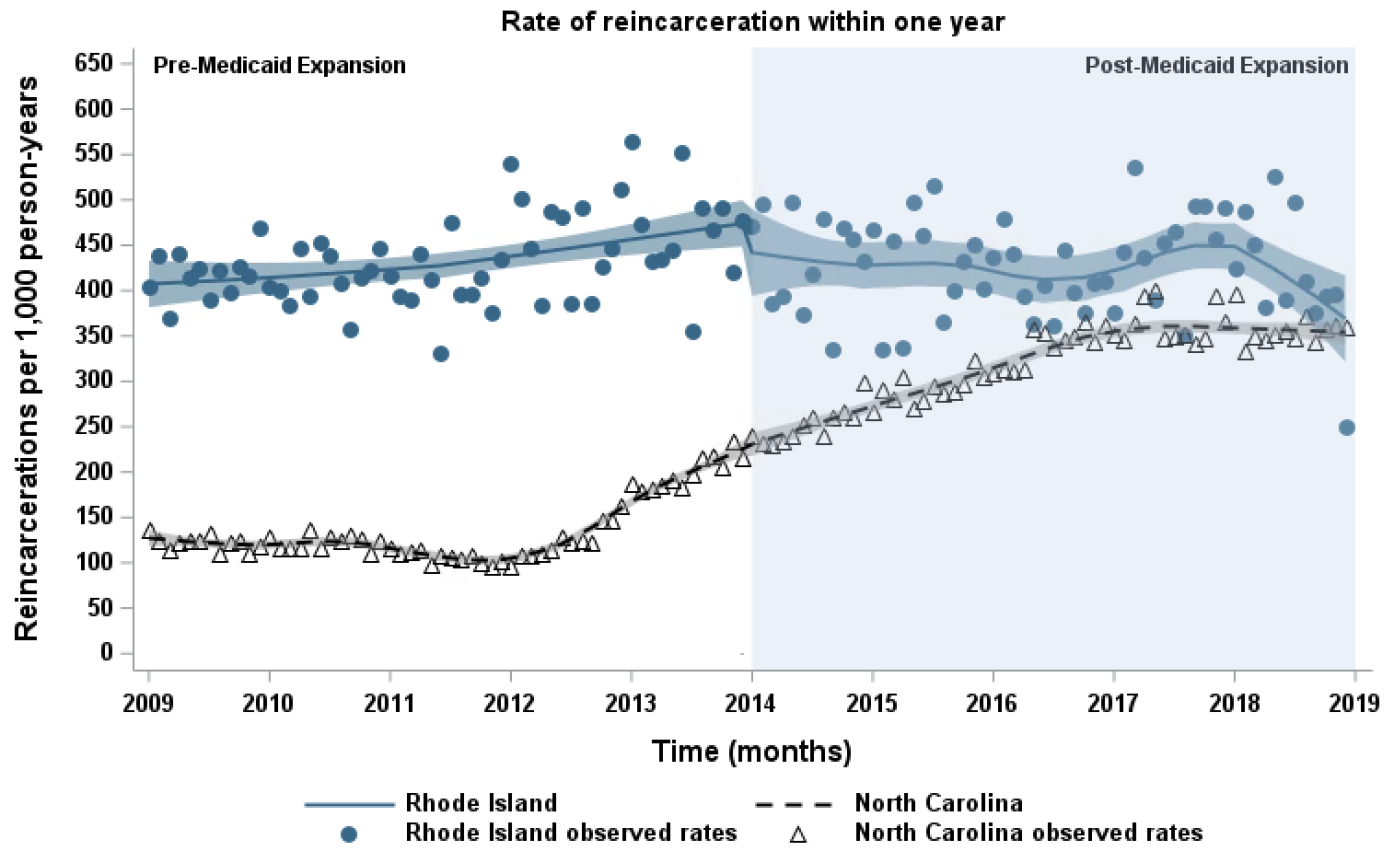

Supplement: jamanetwopen-e2429454-s001.pdf [file jamanetwopen-e2429454-s001.pdf]
